# Supplementary material for: Microwave-assisted growth of WO3·0.33H2O micro/nanostructures with enhanced visible light photocatalytic properties
Source: Royal Society of Chemistry journal article supplement (doi:10.1039/c3ce41005f), 2013-01-01
Supplement: c3ce41005f.pdf [file c3ce41005f.pdf]

Supplementary information

## Microwave-assisted growth of $\text{WO}_3 \cdot 0.33\text{H}_2\text{O}$ micro/nanostructures with enhanced visible light photocatalytic properties

Li Jiayin<sup>a,b</sup>, Huang Jianfeng<sup>a\*</sup>, Wu Jianpeng<sup>a</sup>, Cao Liyun<sup>a</sup>, Li Qijia<sup>a</sup>, Kazumichi Yanagisawa<sup>b</sup>

*a Shaanxi University of Science and Technology, Xi'an 710021, China;*

*b Research Laboratory of Hydrothermal Chemistry, Faculty of Science, Kochi University, 2-5-1 Akebono-cho, Kochi 780-8520, Japan*

The  $\log K_1$ ,  $\log K_2$  and  $\sigma_n$  were calculated by referring to Saison et al<sup>1</sup>. According to their report, the multi site complexation model (MUSIC model) was used to calculate the effective bond charge ( $q_0$ ) of different surface groups. Firstly, the effective bond valence ( $s$ ) is calculated. This valence is defined as  $s = e^{(R-R_0)/b}$ , in which  $R$  is the metal oxygen distance,  $R_0$  is an element specific distance ( $R_0 = 0.1917$  nm for tungsten), and  $b$  is a constant ( $b = 0.037$  nm). Afterwards, the " $q_0$ " was defined as:  $q_0 = \sum s_j + m s_H + n(1 - s_H) + V$ , where  $\sum s_j$  is the sum of effective bond valences of metal cations bonded to oxygen,  $m$  is the number of donating hydrogen bonds,  $n$  is the number of accepting hydrogen bonds,  $s_H$  is the bond valence for an adsorbed proton ( $s_H = 0.8$ ), and  $V$  is the valence of oxygen ( $V = -2$ ). For singly metal-coordinated oxygen, the total number of hydrogen bonds ( $m+n$ ) are defined as 2. For doubly and triply coordinated surface oxygen,  $m+n$  is defined as 1. Therefore, by employing the metal oxygen distance and referring the specific interactions between surface groups and water molecule, it is possible to calculate the charge of the surface oxygen  $q_0$ . Furthermore, this charge  $q_0$  could be used to obtain the intrinsic proton affinity constant  $\log K$  by employing the linear relationship between these two values:  $\log K = -A \cdot q_0$ , in which  $A$  is a constant equal to 19.8. Finally, this relationship allows one to calculate the proton affinity constants  $K_1$  (oxo) and  $K_2$  (hydr) of surface groups  $M_n\text{-O}$  and  $M_n\text{-OH}$ :

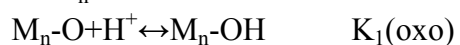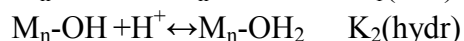

The calculated  $\log K_1$  and  $\log K_2$  were then considered as the reference to know the nature of surface groups ( $M_n\text{-O}$ ,  $M_n\text{-OH}$  and  $M_n\text{-OH}_2$ ) as a function of pH. Besides, the effective charge ( $\sigma_n$ ) of these groups were calculated with their surface density ( $N_s$ ) to obtain the positive charge of one specific surface,  $\sigma^+$  ( $\sigma^+ = \sum \sigma_n \cdot N_s$ ), to compare the acidity of the different surfaces.

By using this method, the most exposed three faces ((010), (001), and (110)) in our products were calculated to find their surface differences, which are shown in table ST1. Furthermore, the effective charge ( $\sigma_n$ ) of the groups in different faces were calculated with their surface density ( $N_s$ ) to obtain the positive charge of one specific surface,  $\sigma^+$  ( $\sigma^+ = \sum \sigma_n \cdot N_s$ ), to compare the acidity of the different surfaces. The calculated results are shown in table ST2.

**Tab.ST1 Proton affinity constants and charge of the surface groups in different faces**

| surface | group                          | logK <sub>1</sub> | logK <sub>2</sub> <sup>a</sup> | charge                              | charge                               | charge                                            |
|---------|--------------------------------|-------------------|--------------------------------|-------------------------------------|--------------------------------------|---------------------------------------------------|
|         |                                |                   |                                | σ <sub>0</sub><br>W <sub>n</sub> -O | σ <sub>1</sub><br>W <sub>n</sub> -OH | σ <sub>2</sub><br>W <sub>n</sub> -OH <sub>2</sub> |
| (010)   | W <sub>1</sub> -O <sub>a</sub> | 15.206            | 3.326                          | -0.768                              | -0.168                               | <b>0.432</b>                                      |
|         | W <sub>1</sub> -O <sub>b</sub> | -10.959           |                                | -0.047                              |                                      |                                                   |
| (001)   | W <sub>2</sub> -O <sub>a</sub> | -5.485            |                                | 0.277                               |                                      |                                                   |
|         | W <sub>2</sub> -O <sub>b</sub> | -1.782            |                                | 0.09                                |                                      |                                                   |
| (110)   | W <sub>1</sub> -O <sub>a</sub> | -10.959           |                                | -0.047                              |                                      |                                                   |
|         | W <sub>1</sub> -O <sub>b</sub> | 15.206            | 3.326                          | -0.768                              | -0.168                               | <b>0.432</b>                                      |
|         | W <sub>2</sub> -O <sub>c</sub> | -4.95             |                                | 0.25                                |                                      |                                                   |
|         | W <sub>2</sub> -O <sub>d</sub> | -1.782            |                                | 0.09                                |                                      |                                                   |

a: The logK<sub>2</sub>, σ<sub>1</sub>, and σ<sub>2</sub> charge values were calculated only when W<sub>n</sub>-OH and W<sub>n</sub>-OH<sub>2</sub> is possible within the pH value from 2 to 12.

**Tab.ST2 Positive charge σ<sup>+</sup> value of the different faces of WO<sub>3</sub>·0.33H<sub>2</sub>O particles**

| faces                       | (010) | (001) | (110) |
|-----------------------------|-------|-------|-------|
| σ <sub>n</sub>              | 0.432 | 0     | 0.432 |
| N <sub>s</sub> <sup>a</sup> | 7.06  | 0     | 0.89  |
| σ <sup>+</sup>              | 3.050 | 0     | 0.384 |

N<sub>s</sub><sup>a</sup>: acidity site density

**Tab.ST3 Approximate calculation of different (010) facets ratios<sup>c</sup>**

| sample <sup>d</sup> | morphologies                            | surface area                    | (010) facets                         | (010) facets |
|---------------------|-----------------------------------------|---------------------------------|--------------------------------------|--------------|
|                     |                                         | (μm <sup>2</sup> ) <sup>b</sup> | area (μm <sup>2</sup> ) <sup>b</sup> | ratio (%)    |
| S1                  | hexagonal sheets                        | 0.255                           | 0.011                                | 4.23         |
| S2                  | snowflakes <sup>a</sup><br>(nanosheets) | 0.371                           | 0.150                                | 40.35        |
| S4                  | urchins <sup>a</sup><br>(nanostrips)    | 0.132                           | 0.041                                | 30.35        |
| S5                  | hexagonal sheets                        | 3.195                           | 0.308                                | 9.64         |
| S6                  | nanowires                               | 0.031                           | 0.020                                | 64.52        |

a: The assembled structures were calculated by measuring one of their specific exposed microstructures (shown in brackets).

b: Average results from 30 particles/exposed microstructures shown in Fig.2, Fig.5 and Fig.8.

c: (110) facets were not calculated since their acidity is low and the exposed area is too small to measure.

d: S3 particles were not calculated because their exposed microstructures are unable to be identified with precise crystal growth information.

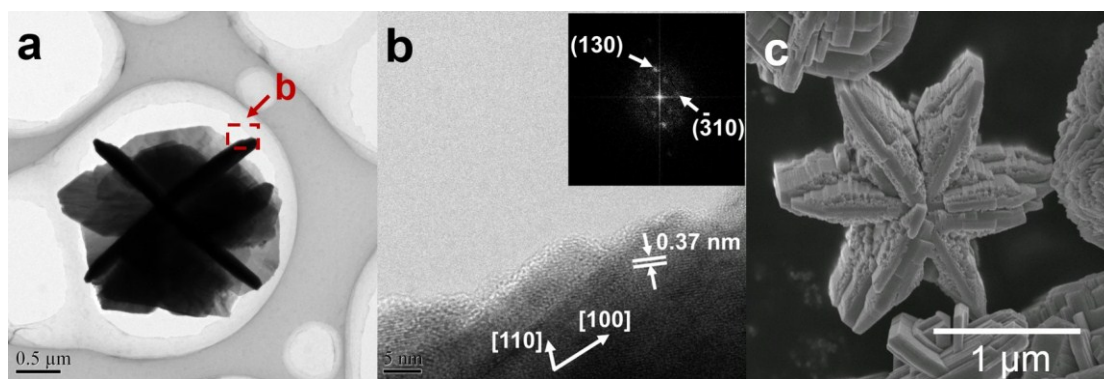

Fig.S1 TEM (a), HRTEM (b) and SEM images (c) of the intermediate products (collected as soon as the reaction temperature reached 180°C) in the microwave-assisted hydrothermal (MH) process.

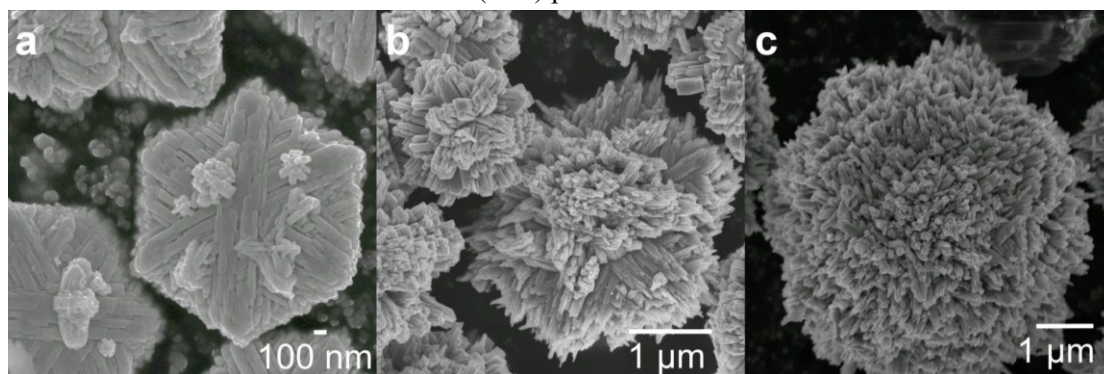

Fig.S2 SEM images of the MH-prepared products with different concentrations of citric acid (a: 0.127 M, b: 0.635M, c: 1.27M)

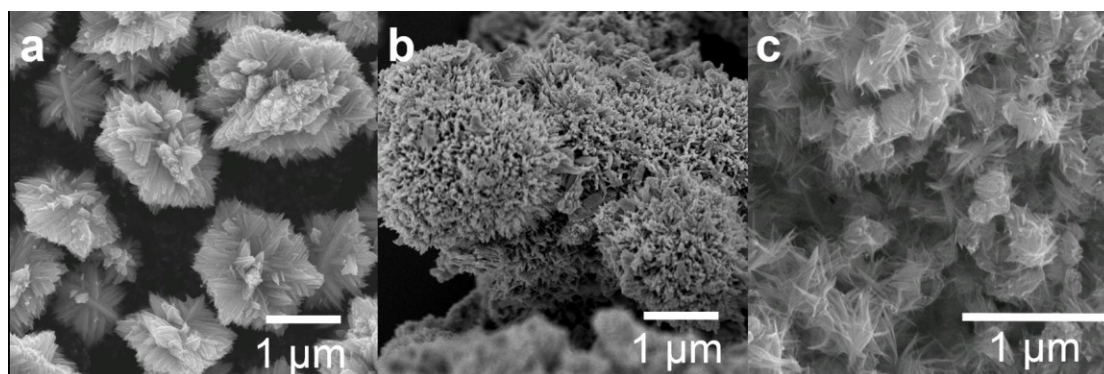

Fig.S3 SEM images of the microwave-assisted products prepared with different amount of isopropyl alcohol in the reaction solvent (a: 10%, b:50%, c:100%)

## Reference

### Reference

1. T. Saison, N. Chemin, C. Chanéac, O. Durupthy, V. r. Ruaux, L. Mariey, F. o. Maugé, P. Beaunier and J.-P. Jolivet, *The Journal of Physical Chemistry C*, 2011, 115, 5657-5666.
